# Supplementary material
Source: publisher figshare collection journal article supplement (https://acs.figshare.com/ndownloader/files/5117854)
Supplement: Supplementary file 1 [file 5117854]

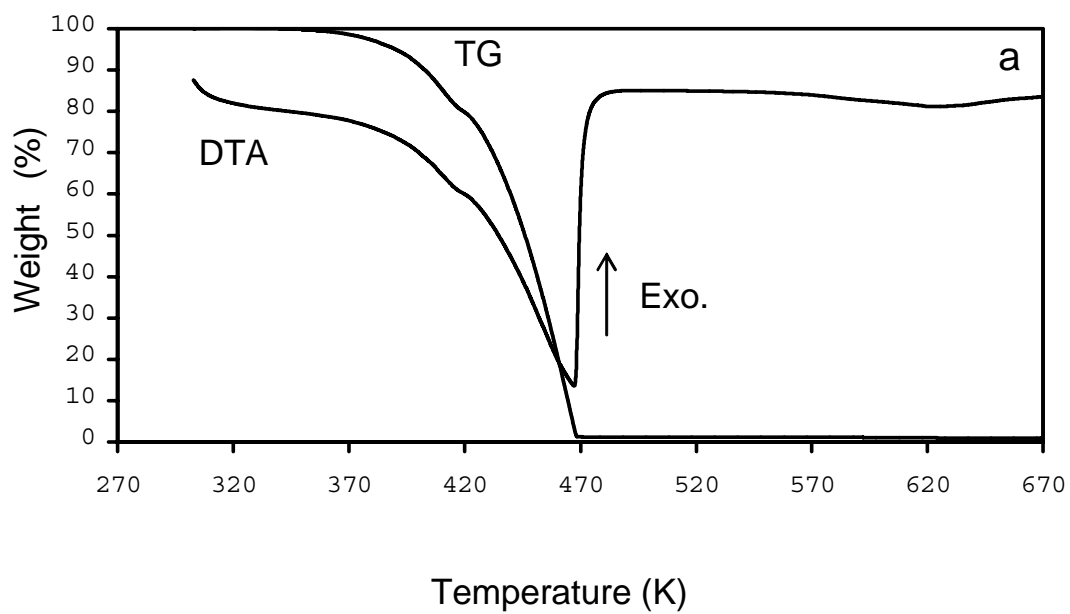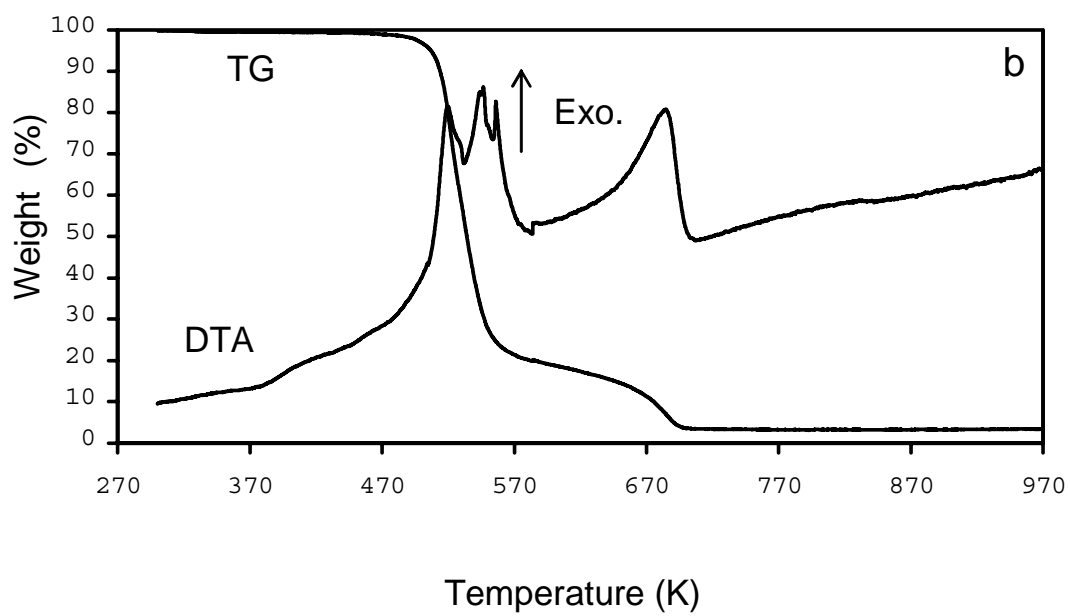

**Figure S1.** TG-DTA curves of (a) EG at heating rate of  $10\text{ K}\cdot\text{min}^{-1}$  and (b) PS at heating rate of  $10\text{ K}\cdot\text{min}^{-1}$ . Air flow rate was  $30\text{ ml}\cdot\text{min}^{-1}$ .

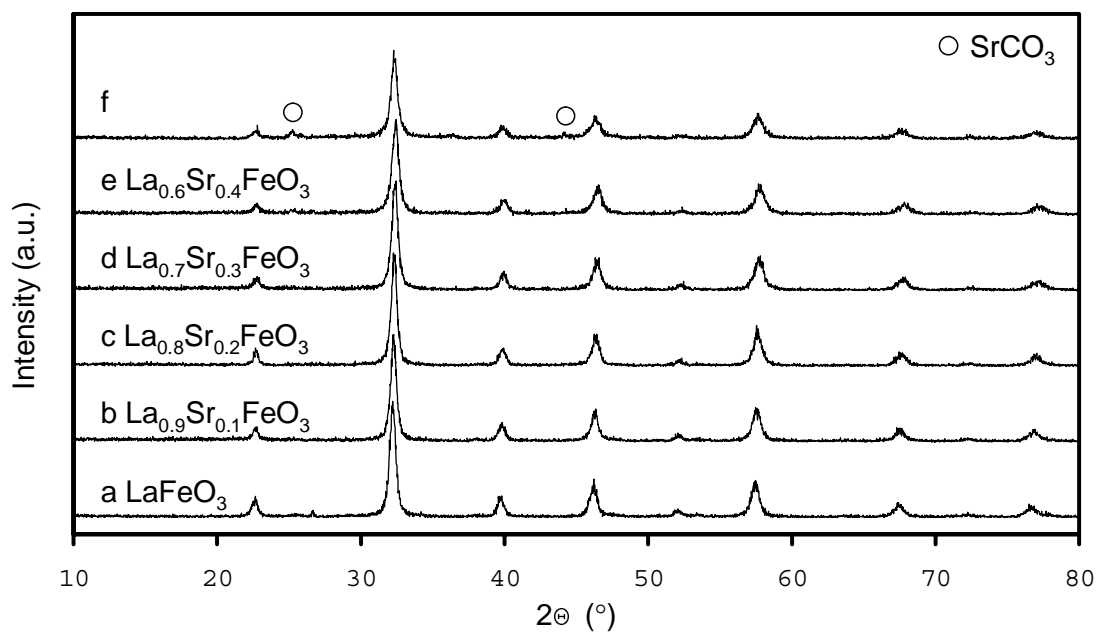

**Figure S2.** XRD patterns of solid materials obtained by a calcination (873 K) of EG-methanol (40 vol%) solution of mixed metal nitrate ( $\text{LaNO}_3 : \text{Sr}(\text{NO}_3)_2 : \text{Fe}(\text{NO}_3)_3 = 1-x : x : 1$ , where  $x = 0.1-0.5$ , total metal concentration was 1.0 M) (a)  $x = 0$ , (b)  $x = 0.1$ , (c)  $x = 0.2$ , (d)  $x = 0.3$ , (e)  $x = 0.4$  and (f)  $x = 0.5$ . Calcination rate was  $1 \text{ K} \cdot \text{min}^{-1}$  and the calcination temperature was kept for 5 hours. Markers are located according to the JCPDS 37-1493  $\text{LaFeO}_3$  card and JCPDS 05-0418  $\text{SrCO}_3$  card.

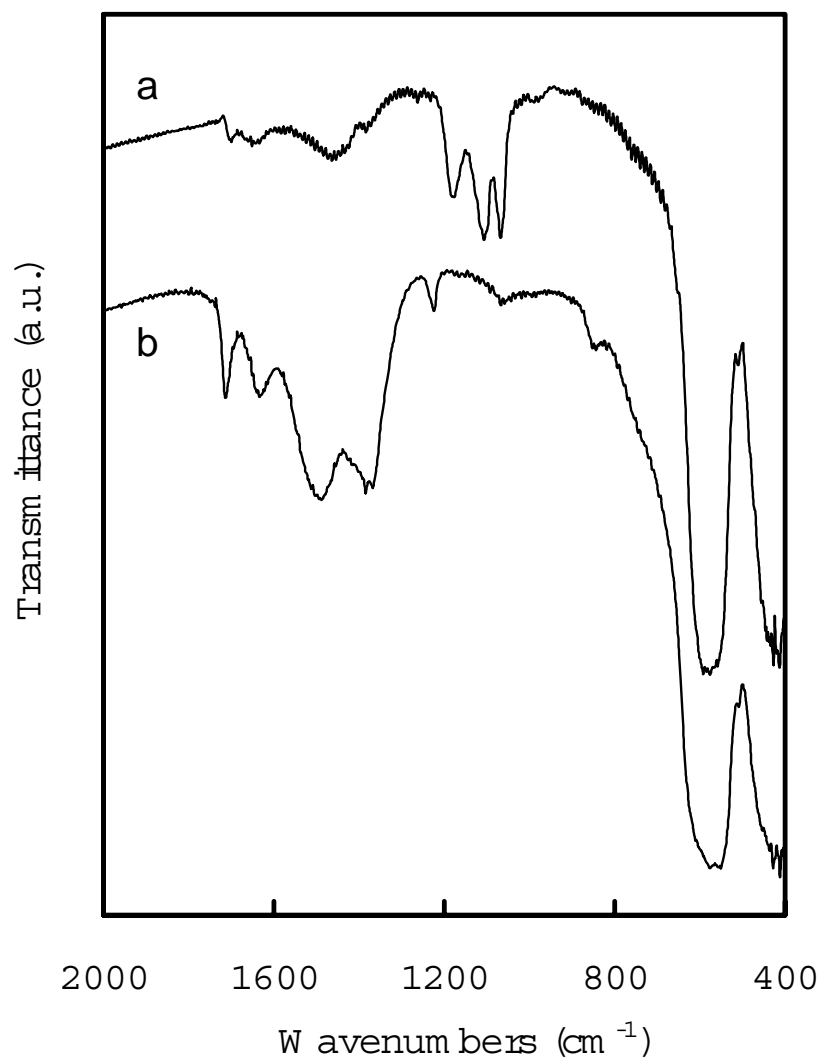

**Figure S3.** IR of (a) 3DOM  $\text{LaFeO}_3$  and (b) non-porous  $\text{LaFeO}_3$  perovskite materials calcined at 873 K for 5 hours.

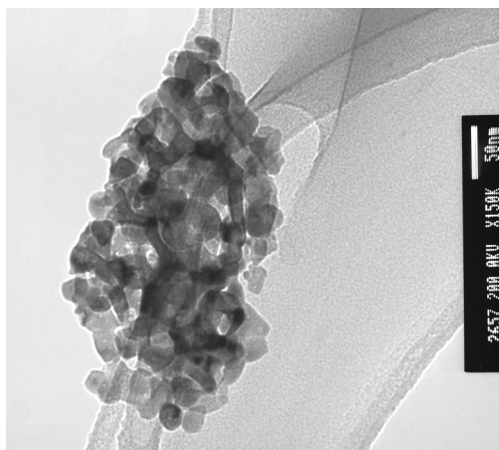

**Figure S4.** TEM image of non-porous LaFeO<sub>3</sub> perovskite material (JEOL JEM-2000FX).
